# Supplementary material for: Functional transcription factor target discovery via compendia of binding and expression profiles
Source: PubMed Central journal article supplement (PMC4746627; doi:10.1038/srep20649), 2016-02-09
Supplement: srep20649-s1.pdf [file srep20649-s1.pdf]

Functional transcription factor target discovery via  
compendia of binding and expression profiles –  
Supplementary Material

Christopher J. Banks, Anagha Joshi, and Tom Michoel

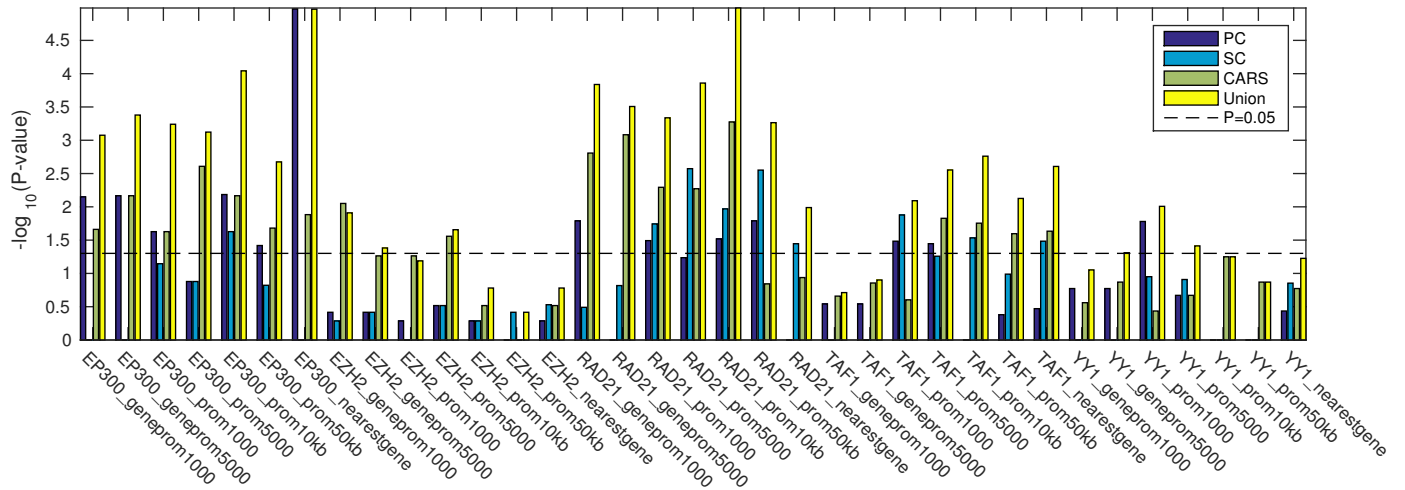

Figure 1: Functional target set significance (hypergeometric P-value) predicted by each of the correlation methods for all peak-to-gene models at a predicted 1.5-fold precision over background.

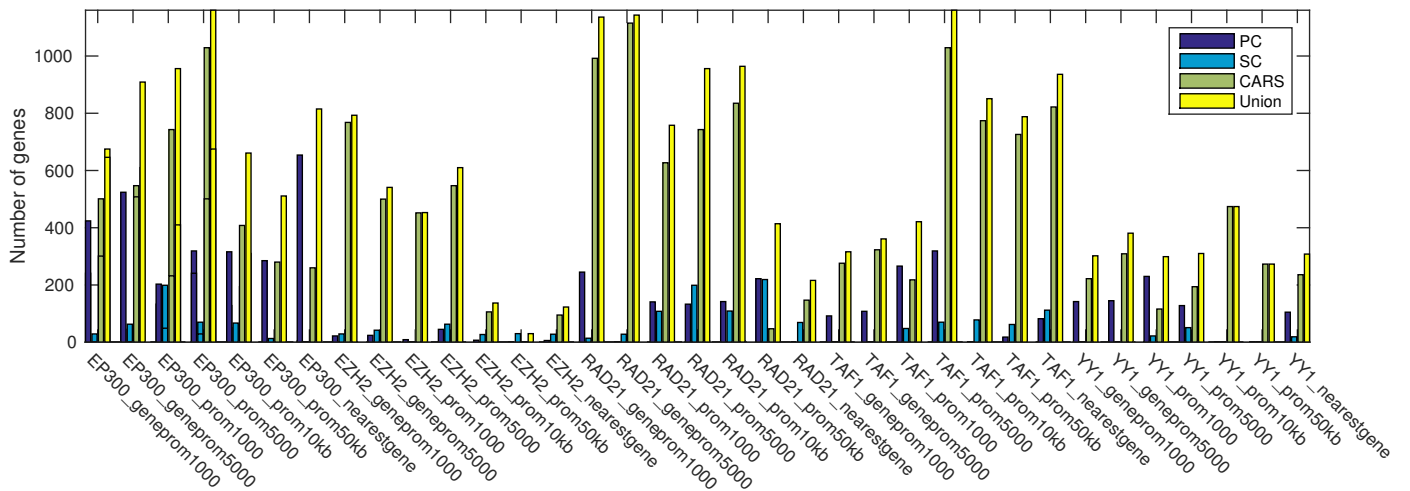

Figure 2: Functional target set sizes predicted by each of the correlation methods for all peak-to-gene models at a predicted 1.5-fold precision over background. Set sizes refer to subsets of the complete set of 24,392 genes exceeding the 1.5-fold precision threshold determined by analysing the 8,872 reference genes.

| TF    | Model        | Binding    |       |                 | MB |                 |
|-------|--------------|------------|-------|-----------------|----|-----------------|
|       |              | Background | Bound | p               | n  | p               |
| EP300 | geneprom1000 | 0.385      | 0.424 | <b>0.000858</b> | 0  | 1               |
|       | geneprom5000 | 0.385      | 0.425 | <b>0.00048</b>  | 0  | 1               |
|       | prom1000     | 0.385      | 0.394 | 0.347           | 0  | 1               |
|       | prom5000     | 0.385      | 0.413 | 0.0512          | 0  | 1               |
|       | prom10kb     | 0.385      | 0.426 | <b>0.00679</b>  | 23 | <b>0.0243</b>   |
|       | prom50kb     | 0.385      | 0.445 | <b>2.97e-06</b> | 86 | <b>0.000156</b> |
|       | nearestgene  | 0.385      | 0.447 | <b>1.03e-07</b> | 29 | <b>0.0218</b>   |
| EZH2  | geneprom1000 | 0.216      | 0.186 | 0.923           | 0  | 1               |
|       | geneprom5000 | 0.216      | 0.197 | 0.827           | 0  | 1               |
|       | prom1000     | 0.216      | 0.178 | 0.877           | 0  | 1               |
|       | prom5000     | 0.216      | 0.216 | 0.529           | 0  | 1               |
|       | prom10kb     | 0.216      | 0.21  | 0.607           | 0  | 1               |
|       | prom50kb     | 0.216      | 0.212 | 0.59            | 0  | 1               |
|       | nearestgene  | 0.216      | 0.205 | 0.72            | 0  | 1               |
| RAD21 | geneprom1000 | 0.38       | 0.398 | <b>0.000132</b> | 18 | <b>0.0392</b>   |
|       | geneprom5000 | 0.38       | 0.4   | <b>5.55e-06</b> | 19 | 0.0618          |
|       | prom1000     | 0.38       | 0.391 | 0.173           | 6  | 0.152           |
|       | prom5000     | 0.38       | 0.415 | <b>3.7e-06</b>  | 12 | 0.125           |
|       | prom10kb     | 0.38       | 0.423 | <b>6.05e-10</b> | 47 | <b>0.00509</b>  |
|       | prom50kb     | 0.38       | 0.405 | <b>3.08e-08</b> | 0  | 1               |
|       | nearestgene  | 0.38       | 0.402 | <b>9.34e-08</b> | 1  | 0.38            |
| TAF1  | geneprom1000 | 0.236      | 0.229 | 0.995           | 4  | 0.239           |
|       | geneprom5000 | 0.236      | 0.229 | 0.995           | 4  | 0.239           |
|       | prom1000     | 0.236      | 0.23  | 0.938           | 0  | 1               |
|       | prom5000     | 0.236      | 0.231 | 0.947           | 13 | 0.173           |
|       | prom10kb     | 0.236      | 0.229 | 0.977           | 0  | 1               |
|       | prom50kb     | 0.236      | 0.23  | 0.953           | 4  | 0.239           |
|       | nearestgene  | 0.236      | 0.232 | 0.924           | 4  | 0.239           |
| YY1   | geneprom1000 | 0.311      | 0.308 | 0.835           | 0  | 1               |
|       | geneprom5000 | 0.311      | 0.307 | 0.893           | 0  | 1               |
|       | prom1000     | 0.311      | 0.305 | 0.919           | 0  | 1               |
|       | prom5000     | 0.311      | 0.309 | 0.712           | 5  | <b>0.0349</b>   |
|       | prom10kb     | 0.311      | 0.31  | 0.57            | 14 | 0.109           |
|       | prom50kb     | 0.311      | 0.308 | 0.756           | 3  | 0.229           |
|       | nearestgene  | 0.311      | 0.308 | 0.791           | 4  | 0.367           |

Table 1: Overlap between various predicted and known functional TF-target sets for ENCODE data. Binding: the ratio of differentially expressed genes among all 8,872 reference genes (Background) and among genes bound by the TF in the given peak-to-gene model (Bound), and the hypergeometric overlap  $P$ -value (p). Multiple Bind: gene sets predicted by a threshold on the number of peaks with a 1.5-fold increase in ratio of differentially expressed genes compared to the background, showing the number of genes (n) and hypergeometric overlap  $P$ -value (p). All subset sizes refer to the number of 8,872 reference genes exceeding the threshold. Significant  $P$ -values ( $< 0.05$ ) are indicated in bold

| TF    | Model        | PC  |                 | SC |                | CARS |                 | Union |                 |
|-------|--------------|-----|-----------------|----|----------------|------|-----------------|-------|-----------------|
|       |              | n   | p               | n  | p              | n    | p               | n     | p               |
| EP300 | geneprom1000 | 41  | <b>0.00709</b>  | 0  | 1              | 29   | <b>0.0218</b>   | 63    | <b>0.00084</b>  |
|       | geneprom5000 | 43  | <b>0.00681</b>  | 0  | 1              | 43   | <b>0.00681</b>  | 78    | <b>0.000418</b> |
|       | prom1000     | 25  | <b>0.0236</b>   | 17 | 0.0715         | 25   | <b>0.0236</b>   | 58    | <b>0.000575</b> |
|       | prom5000     | 12  | 0.132           | 12 | 0.132          | 51   | <b>0.00246</b>  | 69    | <b>0.000754</b> |
|       | prom10kb     | 45  | <b>0.00653</b>  | 25 | <b>0.0236</b>  | 43   | <b>0.00681</b>  | 93    | <b>9.07e-05</b> |
|       | prom50kb     | 24  | <b>0.0381</b>   | 8  | 0.151          | 31   | <b>0.0209</b>   | 59    | <b>0.00211</b>  |
|       | nearestgene  | 119 | <b>1.07e-05</b> | 0  | 1              | 32   | <b>0.0131</b>   | 138   | <b>1.08e-05</b> |
| EZH2  | geneprom1000 | 6   | 0.383           | 3  | 0.518          | 92   | <b>0.00889</b>  | 94    | <b>0.0123</b>   |
|       | geneprom5000 | 6   | 0.383           | 6  | 0.383          | 46   | 0.0546          | 52    | <b>0.0415</b>   |
|       | prom1000     | 3   | 0.518           | 0  | 1              | 46   | 0.0546          | 47    | 0.0648          |
|       | prom5000     | 9   | 0.304           | 9  | 0.304          | 61   | <b>0.0277</b>   | 71    | <b>0.0221</b>   |
|       | prom10kb     | 3   | 0.518           | 3  | 0.518          | 9    | 0.304           | 14    | 0.166           |
|       | prom50kb     | 0   | 1               | 6  | 0.383          | 0    | 1               | 6     | 0.383           |
|       | nearestgene  | 3   | 0.518           | 5  | 0.295          | 9    | 0.304           | 14    | 0.166           |
| RAD21 | geneprom1000 | 35  | <b>0.0162</b>   | 3  | 0.323          | 61   | <b>0.00156</b>  | 91    | <b>0.000145</b> |
|       | geneprom5000 | 0   | 1               | 6  | 0.152          | 70   | <b>0.000826</b> | 76    | <b>0.000311</b> |
|       | prom1000     | 26  | <b>0.0322</b>   | 31 | <b>0.0181</b>  | 47   | <b>0.00509</b>  | 92    | <b>0.00046</b>  |
|       | prom5000     | 21  | 0.058           | 56 | <b>0.00267</b> | 45   | <b>0.00534</b>  | 108   | <b>0.000138</b> |
|       | prom10kb     | 28  | <b>0.0304</b>   | 34 | <b>0.0107</b>  | 71   | <b>0.000532</b> | 116   | <b>1.03e-05</b> |
|       | prom50kb     | 35  | <b>0.0162</b>   | 54 | <b>0.00281</b> | 8    | 0.144           | 86    | <b>0.000544</b> |
|       | nearestgene  | 0   | 1               | 22 | <b>0.0358</b>  | 14   | 0.115           | 36    | <b>0.0103</b>   |
| TAF1  | geneprom1000 | 8   | 0.288           | 0  | 1              | 14   | 0.219           | 17    | 0.194           |
|       | geneprom5000 | 8   | 0.288           | 0  | 1              | 19   | 0.139           | 22    | 0.126           |
|       | prom1000     | 50  | <b>0.0328</b>   | 18 | <b>0.0133</b>  | 11   | 0.25            | 67    | <b>0.00809</b>  |
|       | prom5000     | 47  | <b>0.0358</b>   | 32 | 0.0552         | 70   | <b>0.0149</b>   | 130   | <b>0.0028</b>   |
|       | prom10kb     | 0   | 1               | 36 | <b>0.0293</b>  | 64   | <b>0.0176</b>   | 100   | <b>0.00173</b>  |
|       | prom50kb     | 2   | 0.417           | 28 | 0.103          | 59   | <b>0.0253</b>   | 87    | <b>0.00748</b>  |
|       | nearestgene  | 5   | 0.338           | 50 | <b>0.0328</b>  | 62   | <b>0.0232</b>   | 112   | <b>0.00247</b>  |
| YY1   | geneprom1000 | 10  | 0.169           | 0  | 1              | 6    | 0.275           | 16    | <b>0.0886</b>   |
|       | geneprom5000 | 10  | 0.169           | 0  | 1              | 12   | 0.135           | 22    | <b>0.0489</b>   |
|       | prom1000     | 47  | <b>0.0166</b>   | 9  | 0.112          | 4    | 0.367           | 53    | <b>0.00983</b>  |
|       | prom5000     | 8   | 0.213           | 17 | 0.123          | 8    | 0.213           | 29    | <b>0.0386</b>   |
|       | prom10kb     | 0   | 1               | 0  | 1              | 25   | 0.0563          | 25    | 0.0563          |
|       | prom50kb     | 0   | 1               | 0  | 1              | 12   | 0.135           | 12    | 0.135           |
|       | nearestgene  | 4   | 0.367           | 7  | 0.14           | 10   | 0.169           | 20    | 0.0594          |

Table 2: Overlap between various predicted and known functional TF-target sets for ENCODE data. Pearson Correlation (PC), Spearman Correlation (SC), Combined Angle Ratio Statistic (CARS), and Union: gene sets predicted by a threshold on the correlation score, for each method respectively and for the union of those sets, with a 1.5-fold increase in ratio of differentially expressed genes compared to the background, showing the number of genes (n) and hypergeometric overlap  $P$ -value (p). All subset sizes refer to the number of 8,872 reference genes exceeding the threshold. Significant  $P$ -values ( $< 0.05$ ) are indicated in bold

| TF   | Model       | Binding    |        |               | MB   |               |
|------|-------------|------------|--------|---------------|------|---------------|
|      |             | Background | Bound  | p             | n    | p             |
| Per2 | geneprom1kb | 0.281      | 0.281  | 0.486         | 1    | 0.281         |
|      | geneprom5kb | 0.281      | 0.282  | 0.266         | 11   | 0.17          |
|      | prom1kb     | 0.268      | 0.269  | 0.397         | 0    | 1             |
|      | prom5kb     | 0.272      | 0.277  | <b>0.0414</b> | 0    | 1             |
|      | prom10kb    | 0.28       | 0.284  | 0.0535        | 30   | <b>0.0217</b> |
|      | prom50kb    | 0.279      | 0.281  | 0.141         | 21   | 0.102         |
|      | nearestgene | 0.278      | 0.28   | 0.101         | 2    | 0.478         |
| Cry1 | geneprom1kb | 0.0126     | 0.0126 | 0.734         | 939  | <b>0.0196</b> |
|      | geneprom5kb | 0.0129     | 0.0129 | 0.726         | 580  | 0.0652        |
|      | prom1kb     | 0.0109     | 0.0108 | 0.796         | 70   | <b>0.0393</b> |
|      | prom5kb     | 0.0123     | 0.0124 | 0.644         | 365  | 0.0752        |
|      | prom10kb    | 0.0124     | 0.0125 | 0.562         | 234  | 0.068         |
|      | prom50kb    | 0.0127     | 0.0128 | 0.439         | 213  | 0.132         |
|      | nearestgene | 0.0127     | 0.0127 | 0.7           | 916  | <b>0.035</b>  |
| Cry2 | geneprom1kb | 0.014      | 0.0136 | 0.897         | 1040 | <b>0.0177</b> |
|      | geneprom5kb | 0.014      | 0.0136 | 0.896         | 185  | 0.257         |
|      | prom1kb     | 0.0128     | 0.0121 | 0.903         | 171  | 0.171         |
|      | prom5kb     | 0.013      | 0.0125 | 0.89          | 106  | 0.157         |
|      | prom10kb    | 0.014      | 0.0134 | 0.932         | 24   | 0.287         |
|      | prom50kb    | 0.0149     | 0.0146 | 0.858         | 103  | 0.198         |
|      | nearestgene | 0.0148     | 0.0147 | 0.701         | 378  | 0.103         |

Table 3: Overlap between various predicted and known functional TF-target sets for mouse circadian data. Binding: the ratio of differentially expressed genes among all 8,872 reference genes (Background) and among genes bound by the TF in the given peak-to-gene model (Bound), and the hypergeometric overlap  $P$ -value (p). Multiple Bind: gene sets predicted by a threshold on the number of peaks with a 1.5-fold increase in ratio of differentially expressed genes compared to the background, showing the number of genes (n) and hypergeometric overlap  $P$ -value (p). Significant  $P$ -values ( $< 0.05$ ) are indicated in bold

| TF   | Model       | PC   |                | SC   |                 | CARS |               | Union |                 |
|------|-------------|------|----------------|------|-----------------|------|---------------|-------|-----------------|
|      |             | n    | p              | n    | p               | n    | p             | n     | p               |
| Per2 | geneprom1kb | 2    | 0.483          | 10   | 0.119           | 0    | 1             | 10    | 0.119           |
|      | geneprom5kb | 0    | 1              | 10   | 0.119           | 0    | 1             | 10    | 0.119           |
|      | prom1kb     | 4    | 0.292          | 2    | 0.464           | 0    | 1             | 6     | 0.198           |
|      | prom5kb     | 17   | 0.153          | 3    | 0.182           | 0    | 1             | 19    | 0.117           |
|      | prom10kb    | 0    | 1              | 9    | 0.225           | 0    | 1             | 9     | 0.225           |
|      | prom50kb    | 0    | 1              | 0    | 1               | 0    | 1             | 0     | 1               |
|      | nearestgene | 0    | 1              | 0    | 1               | 0    | 1             | 0     | 1               |
| Cry1 | geneprom1kb | 2164 | <b>0.00039</b> | 1728 | <b>0.000496</b> | 528  | 0.124         | 2432  | <b>0.000524</b> |
|      | geneprom5kb | 1807 | <b>0.00239</b> | 1807 | <b>0.00239</b>  | 619  | 0.0959        | 2288  | <b>0.000677</b> |
|      | prom1kb     | 856  | 0.0549         | 61   | 0.491           | 367  | 0.203         | 1015  | 0.0509          |
|      | prom5kb     | 1026 | <b>0.0301</b>  | 702  | 0.0778          | 486  | 0.137         | 1298  | <b>0.0117</b>   |
|      | prom10kb    | 268  | 0.238          | 45   | 0.107           | 536  | 0.121         | 691   | 0.138           |
|      | prom50kb    | 420  | 0.16           | 1204 | <b>0.0207</b>   | 473  | 0.142         | 1493  | <b>0.012</b>    |
|      | nearestgene | 787  | <b>0.0671</b>  | 1393 | <b>0.0101</b>   | 577  | 0.111         | 1760  | <b>0.00607</b>  |
| Cry2 | geneprom1kb | 1570 | <b>0.00144</b> | 566  | 0.087           | 54   | 0.536         | 1609  | <b>0.00238</b>  |
|      | geneprom5kb | 1670 | <b>0.00103</b> | 608  | <b>0.0356</b>   | 95   | 0.385         | 1727  | <b>0.000851</b> |
|      | prom1kb     | 622  | 0.0659         | 229  | 0.162           | 0    | 1             | 622   | 0.0659          |
|      | prom5kb     | 974  | <b>0.0201</b>  | 422  | <b>0.0368</b>   | 512  | 0.111         | 1144  | <b>0.00134</b>  |
|      | prom10kb    | 1145 | <b>0.0095</b>  | 427  | <b>0.0287</b>   | 572  | 0.0873        | 1339  | <b>0.00123</b>  |
|      | prom50kb    | 44   | 0.485          | 0    | 1               | 760  | <b>0.0484</b> | 773   | 0.0555          |
|      | nearestgene | 1352 | <b>0.00667</b> | 774  | <b>0.0289</b>   | 135  | 0.322         | 1468  | <b>0.00298</b>  |

Table 4: Overlap between various predicted and known functional TF-target sets for mouse circadian data. Pearson Correlation (PC), Spearman Correlation (SC), Combined Angle Ratio Statistic (CARS), and Union: gene sets predicted by a threshold on the correlation score, for each method respectively and for the union of those sets, with a 1.5-fold increase in ratio of differentially expressed genes compared to the background, showing the number of genes (n) and hypergeometric overlap  $P$ -value (p). Significant  $P$ -values ( $< 0.05$ ) are indicated in bold

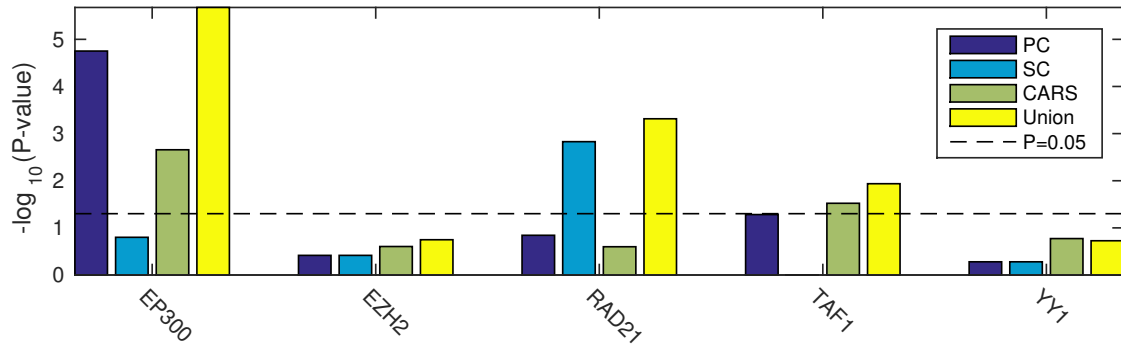

Figure 3: Functional target set significance (hypergeometric P-value) using quantitative (sum of peak heights) ChIP-seq data predicted by each of the correlation methods for the prom5kb peak-to-gene model at a predicted 1.5-fold precision over background.

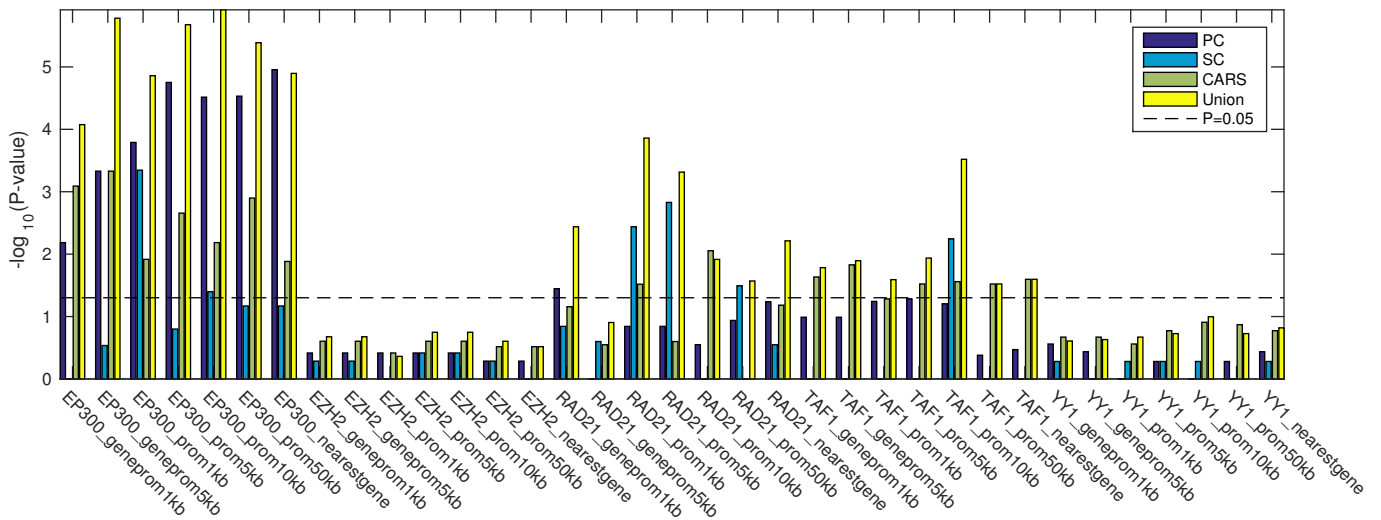

Figure 4: Functional target set significance (hypergeometric P-value) using quantitative (sum of peak heights) ChIP-seq data predicted by each of the correlation methods for all peak-to-gene models at a predicted 1.5-fold precision over background.

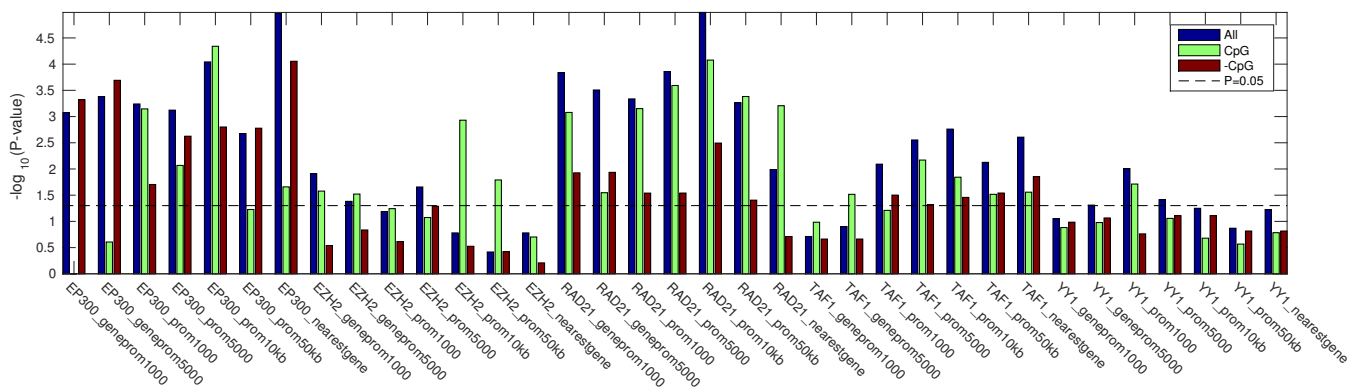

Figure 5: Functional target set significance (hypergeometric P-value), using CpG partitioned datasets, predicted by each of the correlation methods for all peak-to-gene models at a predicted 1.5-fold precision over background. We show significance using all genes (blue), only CpG-rich promoters (green), and only CpG-depleted promoters (red).

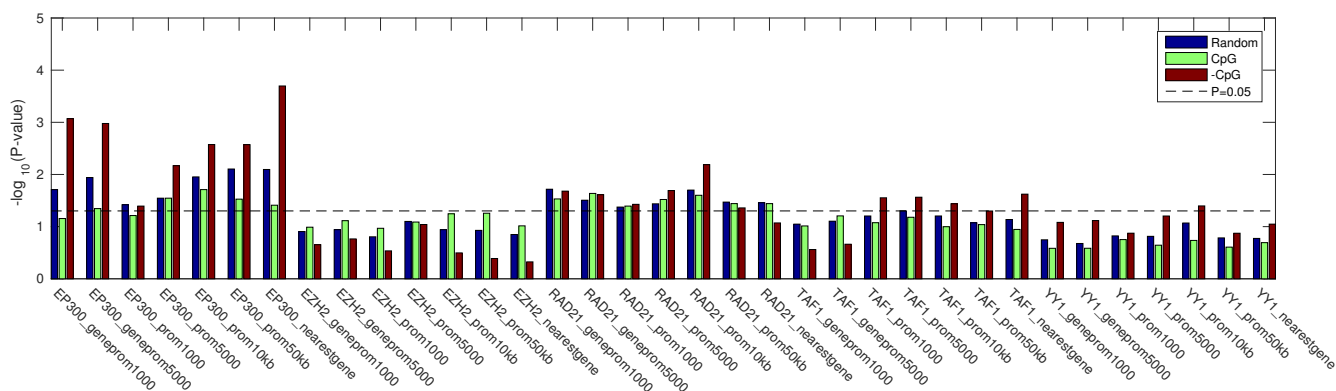

Figure 6: Functional target set significance (hypergeometric P-value), using CpG partitioned datasets, each of 1000 randomly selected genes, predicted by each of the correlation methods for all peak-to-gene models at a predicted 1.5-fold precision over background. We show significance using all genes (blue), only CpG-rich promoters (green), and only CpG-depleted promoters (red). All results are the average of 100 random samples of 1000 genes per set.



| Data                     | TFs                                                           | Source                                                                                                                                                  |
|--------------------------|---------------------------------------------------------------|---------------------------------------------------------------------------------------------------------------------------------------------------------|
| Human                    |                                                               |                                                                                                                                                         |
| ChIP-seq                 | EP300<br>EZH2<br>RAD21<br>TAF1<br>YY1<br>CEBPB<br>MYC<br>REST | <a href="https://genome.ucsc.edu/ENCODE/dataMatrix/encodeChipMatrixHuman.html">https://genome.ucsc.edu/ENCODE/dataMatrix/encodeChipMatrixHuman.html</a> |
| RNA-seq                  | EP300<br>EZH2<br>RAD21<br>TAF1<br>YY1<br>CEBPB<br>MYC<br>REST | <a href="https://genome.ucsc.edu/ENCODE/dataMatrix/encodeDataMatrixHuman.html">https://genome.ucsc.edu/ENCODE/dataMatrix/encodeDataMatrixHuman.html</a> |
| Knockout                 | EP300<br>EZH2<br>RAD21<br>TAF1<br>YY1                         | Cusanovich et al. (2014)                                                                                                                                |
| Mouse                    |                                                               |                                                                                                                                                         |
| ChIP-seq<br>&<br>RNA-seq | Bmal1<br>Clock<br>Cry1<br>Cry2<br>Per1<br>Per2                | Koike et al. (2012)                                                                                                                                     |
| Knockout                 | Per2                                                          | <a href="http://www.ncbi.nlm.nih.gov/geo/query/acc.cgi?acc=GSE30139">http://www.ncbi.nlm.nih.gov/geo/query/acc.cgi?acc=GSE30139</a>                     |

Table 5: Data sources.
